# Supplementary material for: Impaired behavioural pain responses in hph-1 mice with inherited deficiency in GTP cyclohydrolase 1 in models of inflammatory pain
Source: PubMed Central journal article supplement (PMC3626862; doi:10.1186/1744-8069-9-5), 2013-02-19
Supplement: 1744-8069-9-5-S2.pdf [file 1744-8069-9-5-S2.pdf]

### Paw swelling

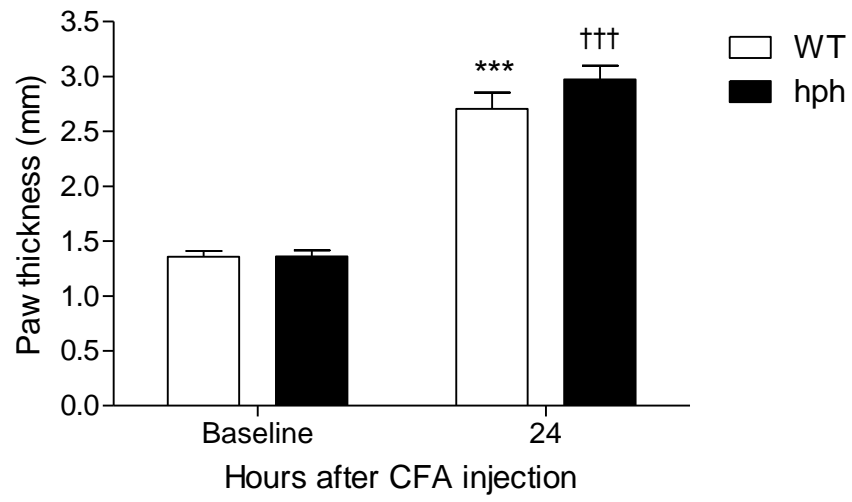

Additional file 2
